# Supplementary material for: Apoptotic cell death of stomach cancer lines (AGS) induced by Co-NTB complex through cellular organelles and DNA damage
Source: Royal Society of Chemistry journal article supplement (doi:10.1039/d4ra06377e), 2025-01-01
Supplement: d4ra06377e1.pdf [file d4ra06377e1.pdf]

## Supporting Information

### **Apoptotic Cell Death of Stomach Cancer Lines (AGS) Induced by Co-NTB Complex by Targeting Cellular Organelles and DNA**

Sri Renukadevi Balusamy,<sup>a</sup> Mani Balamurugan,<sup>b</sup> Sumitha Purushothaman,<sup>c</sup> Sivaraman Somasundaram,<sup>d</sup> Daewon Sohn,<sup>e</sup> Ivan Mijakovic<sup>e,f,g</sup> Shadi Rahimi,<sup>f\*</sup> Haribalan Perumalsamy<sup>h,i\*</sup>

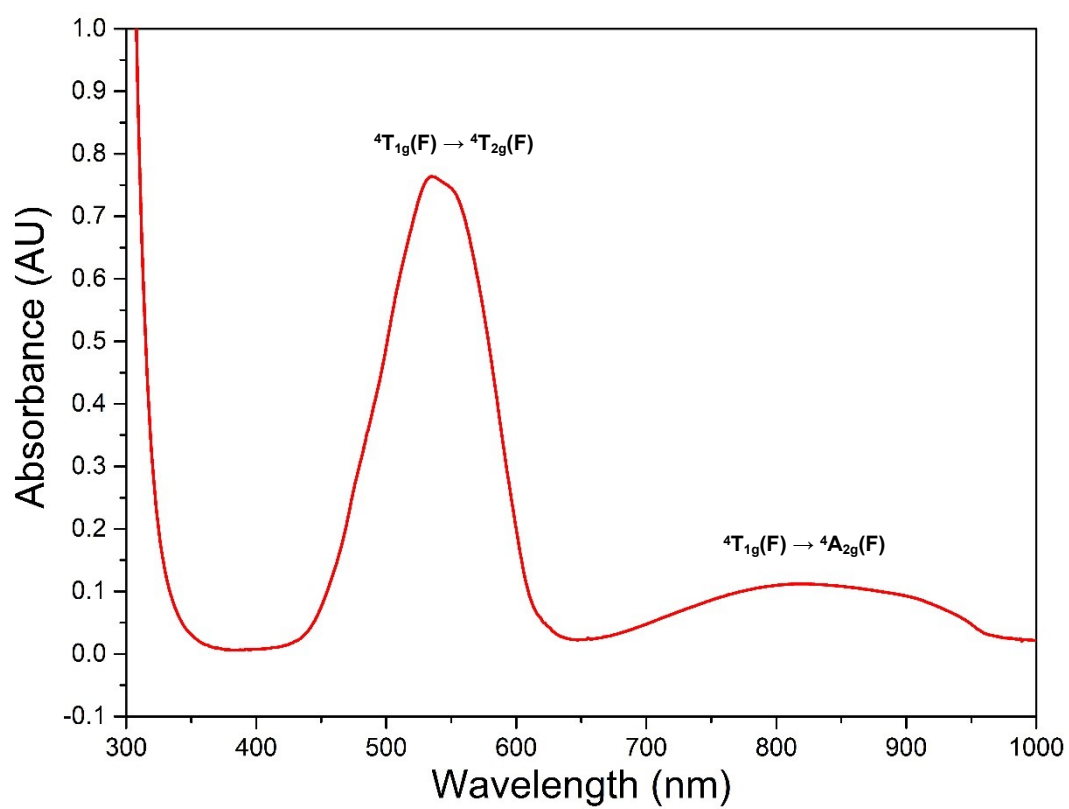

Figure S1: UV-Visible spectra of [Co(NTB)Cl]Cl in water (0.3mM)

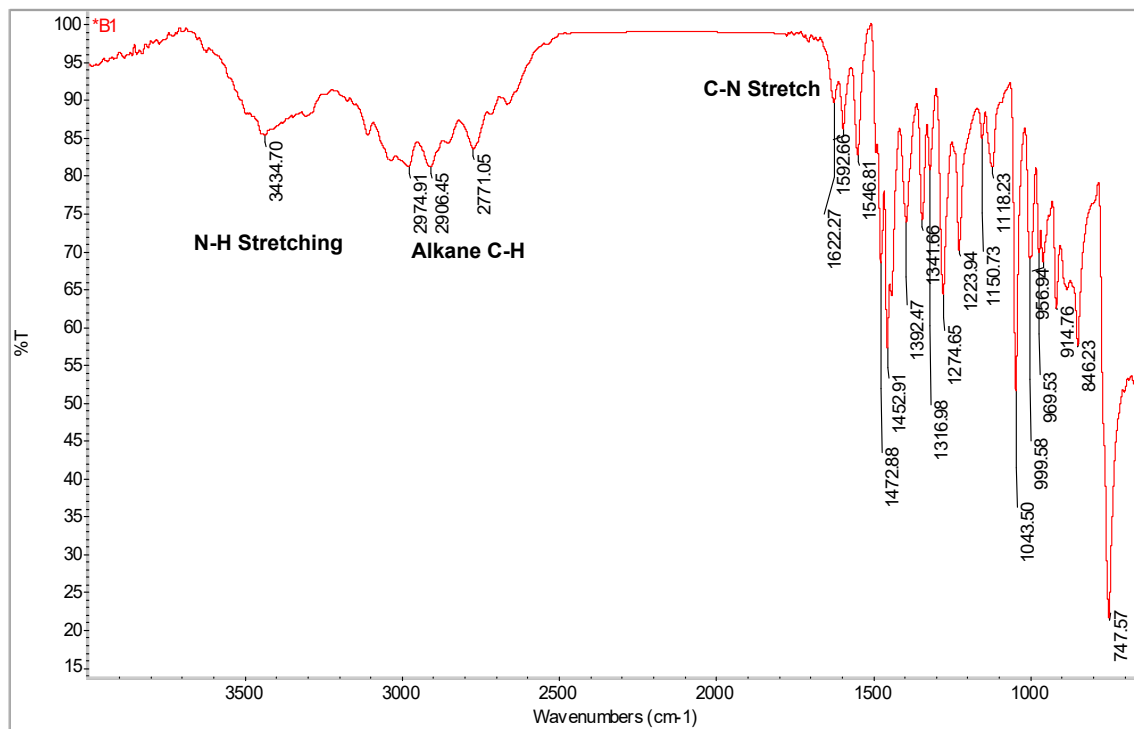

Figure S2: IR spectra of [Co(NTB)Cl]Cl

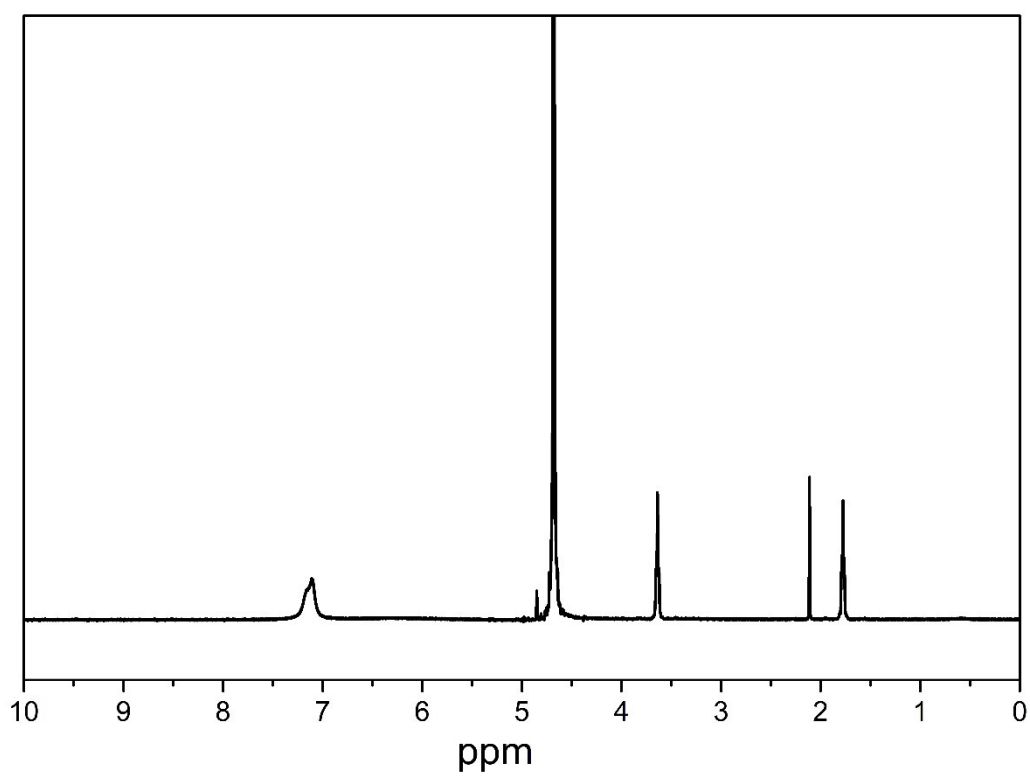

Figure S3: NMR spectra of  $[\text{Co}(\text{NTB})\text{Cl}]\text{Cl}$  in water

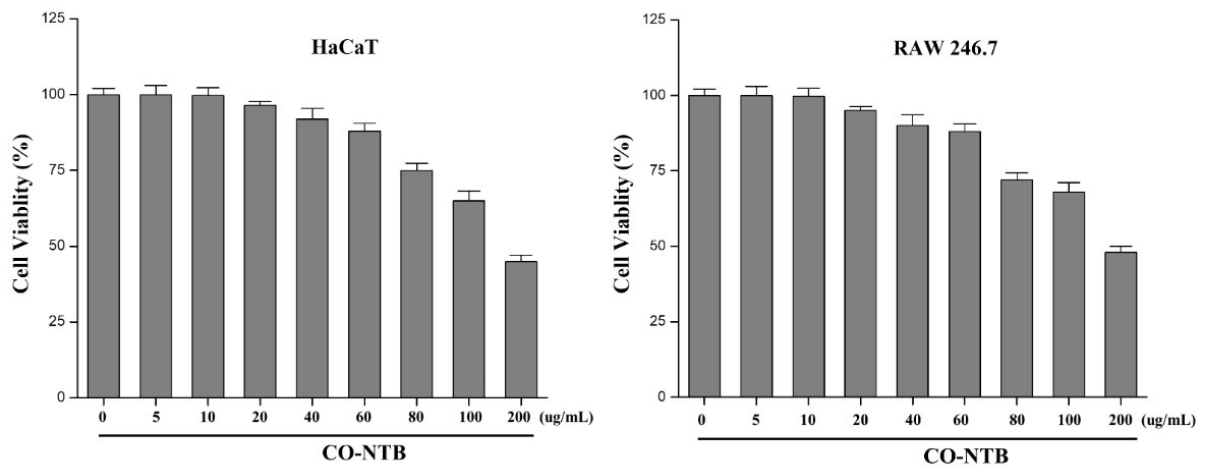

Figure S4: Toxicity assessment of Co-NTB in human keratinocyte cell line (HaCaT) and murine mouse macrophage (RAW 246.7)
